# Supplementary material for: Revealing the potential pharmacological mechanism of traditional Chinese medicine by integrating metabolite profiling of a Q-marker and network pharmacology, prim-O-glucosylcimifugin as an example
Source: Royal Society of Chemistry journal article supplement (doi:10.1039/d1nj02209a), 2021-01-01
Supplement: d1nj02209a1.pdf [file d1nj02209a1.pdf]

Supplementary materials

---

1 **Revealing the potential pharmacological mechanism of traditional Chinese**  
2 **medicine by integrating metabolite profiling of Q-marker and network**  
3 **pharmacology, prim-O-glucosylcimifugin as an example**

4

5 Feng-xiang Zhang <sup>a</sup>, Yu-lin-lan Yuan <sup>a</sup>, Shuang-shuang Cui <sup>a</sup>, Guan-hua Wang <sup>b,\*</sup> and  
6 Rui-man Li <sup>a,\*</sup>

7 <sup>a</sup> Department of gynaecology and obstetrics, The First Affiliated Hospital of Jinan  
8 University, Guangzhou 510630, China

9 <sup>b</sup> College of Veterinary Medicine, South China Agricultural University, Guangzhou  
10 510642, China

11

12 \* Correspondence to: Prof. Rui-man Li, Department of gynaecology and obstetrics, the  
13 First Affiliated Hospital of Jinan University, Guangzhou 510630, China, Tel: +86 020-  
14 38688603, fax: +86 020-38688603, E-mail: hqyyck@126.com; Prof. Guan-hua Wang,  
15 College of Veterinary Medicine, South China Agricultural University, Guangzhou  
16 510642, China. E-mail: ghwang@scau.edu.cn; Tel: +86-2085280234, fax: +86-  
17 02085280234

18

19

20

21

22

23

24

25

26

27

28

29

30

31

32

33 **Table S1** Peak area of prim-O-glucosylcimifugin and its metabolites in rats.

| Name       | Plasma | Urine   | Feces  | Heart | Liver | Spleen | Lung | Kidney | Brain |
|------------|--------|---------|--------|-------|-------|--------|------|--------|-------|
| <b>P1</b>  | 204022 | 1597950 | 104036 | 3719  | 51590 | 590    | 9767 | 4773   | 516   |
| <b>M1</b>  | -      | 6423    | -      | -     | -     | -      | -    | -      | -     |
| <b>M2</b>  | -      | 9422    | 1316   | -     | -     | -      | -    | -      | -     |
| <b>M3</b>  | -      | 26965   | 5884   | -     | -     | -      | -    | -      | -     |
| <b>M4</b>  | 371    | 6932    | -      | -     | -     | -      | -    | -      | -     |
| <b>M5</b>  | -      | 111121  | -      | -     | -     | -      | -    | -      | -     |
| <b>M6</b>  | 202    | 61026   | 42966  | -     | -     | -      | -    | 647    | -     |
| <b>M7</b>  | -      | 2730    | -      | -     | -     | -      | -    | -      | -     |
| <b>M8</b>  | -      | 7003    | 1164   | -     | -     | -      | -    | -      | -     |
| <b>M9</b>  | 419    | 13404   | -      | -     | -     | -      | -    | -      | -     |
| <b>M10</b> | -      | 3179    | -      | -     | -     | -      | -    | -      | -     |
| <b>M11</b> | 299    | 7080    | -      | -     | -     | -      | -    | -      | -     |
| <b>M12</b> | -      | 35753   | 3158   | -     | -     | -      | -    | -      | -     |
| <b>M13</b> | 7263   | 1203578 | 165015 | 1352  | 9128  | 312    | 1539 | 17837  | 316   |
| <b>M14</b> | 51     | 39968   | 71057  | -     | -     | -      | -    | 270    | -     |
| <b>M15</b> | 132    | 1094    | 47464  | -     | -     | -      | -    | 581    | -     |
| <b>M16</b> | -      | 8973    | 2288   | -     | -     | -      | -    | -      | -     |
| <b>M17</b> | 28346  | 2549865 | 630560 | 4552  | 35382 | 893    | 4365 | 32551  | 943   |
| <b>M18</b> | 92     | 7397    | 43786  | -     | -     | -      | -    | -      | -     |

Supplementary materials

|            |         |         |         |      |         |     |        |         |        |
|------------|---------|---------|---------|------|---------|-----|--------|---------|--------|
| <b>M19</b> | 2899    | 575590  | 638469  | 262  | 2896    | -   | -      | 4682    | 299    |
| <b>M20</b> | 12883   | 2849057 | 3580052 | -    | 11705   | 584 | -      | 78605   | 1088   |
| <b>M21</b> | -       | 367531  | -       | -    | 6166    | -   | 1640   | 1576    | 1101   |
| <b>M22</b> | 576     | 44214   | 15107   | -    | -       | -   | -      | 1828    | -      |
| <b>M23</b> | 425880  | 2278949 | 9860    | -    | 17407   | 658 | 13922  | 191585  | 3692   |
| <b>M24</b> | 30713   | 3013841 | 413372  | 3797 | 22157   | 848 | 4160   | 32365   | 832    |
| <b>M25</b> | 3725    | 263003  | 271467  | -    | -       | -   | -      | 2083    | -      |
| <b>M26</b> | -       | 570100  | -       | -    | -       | -   | -      | -       | -      |
| <b>M27</b> | 2012    | 223444  | -       | -    | -       | -   | -      | -       | -      |
| <b>M28</b> | 2492572 | 8576829 | 1452717 | -    | 1823586 | -   | 709697 | 1139422 | 241427 |
| <b>M29</b> | -       | 398245  | 1010    | -    | -       | -   | -      | -       | -      |
| <b>M30</b> | 9398    | 77831   | -       | -    | -       | -   | -      | -       | -      |
| <b>M31</b> | 1552    | 524814  | -       | -    | 1516    | -   | -      | -       | -      |
| <b>M32</b> | 9193    | 96230   | -       | -    | -       | -   | -      | -       | -      |
| <b>M33</b> | 5642    | 461745  | 443818  | -    | 6858    | 131 | 504    | 15823   | -      |
| <b>M34</b> | -       | 830010  | 413262  | -    | -       | -   | -      | -       | -      |
| <b>M35</b> | 524     | 1014573 | 36471   | -    | 1166    | -   | -      | 1024    | 230    |

34 -no detected.

35
